# Supplementary material
Source: publisher site journal article supplement (https://www.dovepress.com/get_supplementary_file.php?f=425874.docx)
Supplement: Supplementary file 1 [file get_supplementary_file.php]

**Table S1** Demographic data and clinical characteristics of LBLP subgroups and HC groups

| **Characteristics** | **Acute LBLP vs HC** | | | **Chronic LBLP vs HC** | | | | **Acute LBLP vs chronic LBLP** |
| --- | --- | --- | --- | --- | --- | --- | --- | --- |
| aLBLP (n = 16) | HC (n = 20) | P values | cLBLP (n = 19) | HC (n = 30) | | P values | P values |
| **Demographic data** | | | | | | | | |
| Age （y）a | 54.5 (40.3, 61.5) | 42 (39,,53） | 0.155 | 51(36,60) | | 40.0（38.0,50.8） | 0.345 | - |
| Sex（M/F）b | 14|2 | 16/4 | 0.672 | 10/9 | | 16|14 | 0.962 | - |
| Duration (months) | 1.00 (0.83,2.00) | n/a |  | 24.00(63.25,36.83) | | n/a |  |  |
| **Clinical data** c | | | | | | | | |
| JOA | 14.13±3.83 | n/a | n/a | 12.95±4.31 | | n/a |  | 0.997 |
| VAS | 5.25±1.00 | n/a | n/a | 5.47±0.84 | | n/a |  | 0.687 |
| PRI | 4.81±1.80 | n/a | n/a | 5.32±2.19 | | n/a |  | 0.468 |
| HAMD | 3.63±2.00 | n/a | n/a | 4.84±2.43 | | n/a |  | 0.384 |
| HAMA | 2.06±1.65 | n/a | n/a | 2.42±1.12 | | n/a |  | 0.686 |
| **von Frey filaments (vF) test values (mN)** (p25, p75) **c** | | | | | | | | |
| vF of left hand | 588.0(255.0, 588.0) | n/a | n/a | 588.0(147.0, 588.0) | | n/a |  | 0.376 |
| vF of right hand | 588.0(255.0, 588.0) | n/a | n/a | 588.0(255.0, 588.0) | | n/a |  | 0.410 |
| vF of left lumbar | 58.8(39.2, 134.8) | n/a | n/a | 78.4(39.2, 147.0) | | n/a |  | 0.973 |
| vF of right lumbar | 58.80(51.5, 78.4) | n/a | n/a | 98.0(39.2, 98.0) | | n/a |  | 0.535 |
| vF of left calf | 78.4(58.8, 134.8) | n/a | n/a | 78.4(39.2, 147.0) | | n/a |  | 0.933 |
| vF of right calf | 78.4(58.8, 98.0) | n/a | n/a | 78.4(58.8, 147.0) | | n/a |  | 0.960 |
| vF of left foot | 58.8(39.2, 73.5) | n/a | n/a | 39.2(39.2, 78.4) | | n/a |  | 0.561 |
| vF of right foot | 58.8(44.1, 78.4) | n/a | n/a | 58.8(19.6, 78.4) | | n/a |  | 0.400 |
| **Neuroimaging data** | | | | | | | | |
| FD  Median (p25, p75)a | 0.025 (0.016, 0.032) | 0.021 (0.016,0.032) | 0.524 | 0.021 (0.013,0.041) | | 0.026 (0.021,0.030) | 0.689 | - |

**Notes:** a Mann-Whitney Test; b Chi-squared test; cTwo-sample t test.

**Abbreviations:** LBLP, low-back-related leg pain; aLBLP, acute LBLP; cLBLP, chronic LBLP; HC, healthy control; SD, standard deviation; y, years; F, female; M, male; n/a, not available; JOA, Japanese Orthopaedic Association; VAS, visual analog scale; PRI, pain rating index; HAMD, Hamilton Depression Scale; HAMA, Hamilton Anxiety Scale; FD, frame displacement. -, Not compared; mN, millinewton.

**Figure S1** Spearman’s correlational analysis between decreased rsFC of left amygdala (A) and lg-transformed vF test values (lg[vF]) in acute LBLP patiens, between decreased rsFC of right amygdala (B) and lg(vF) values in chronic LBLP patients.


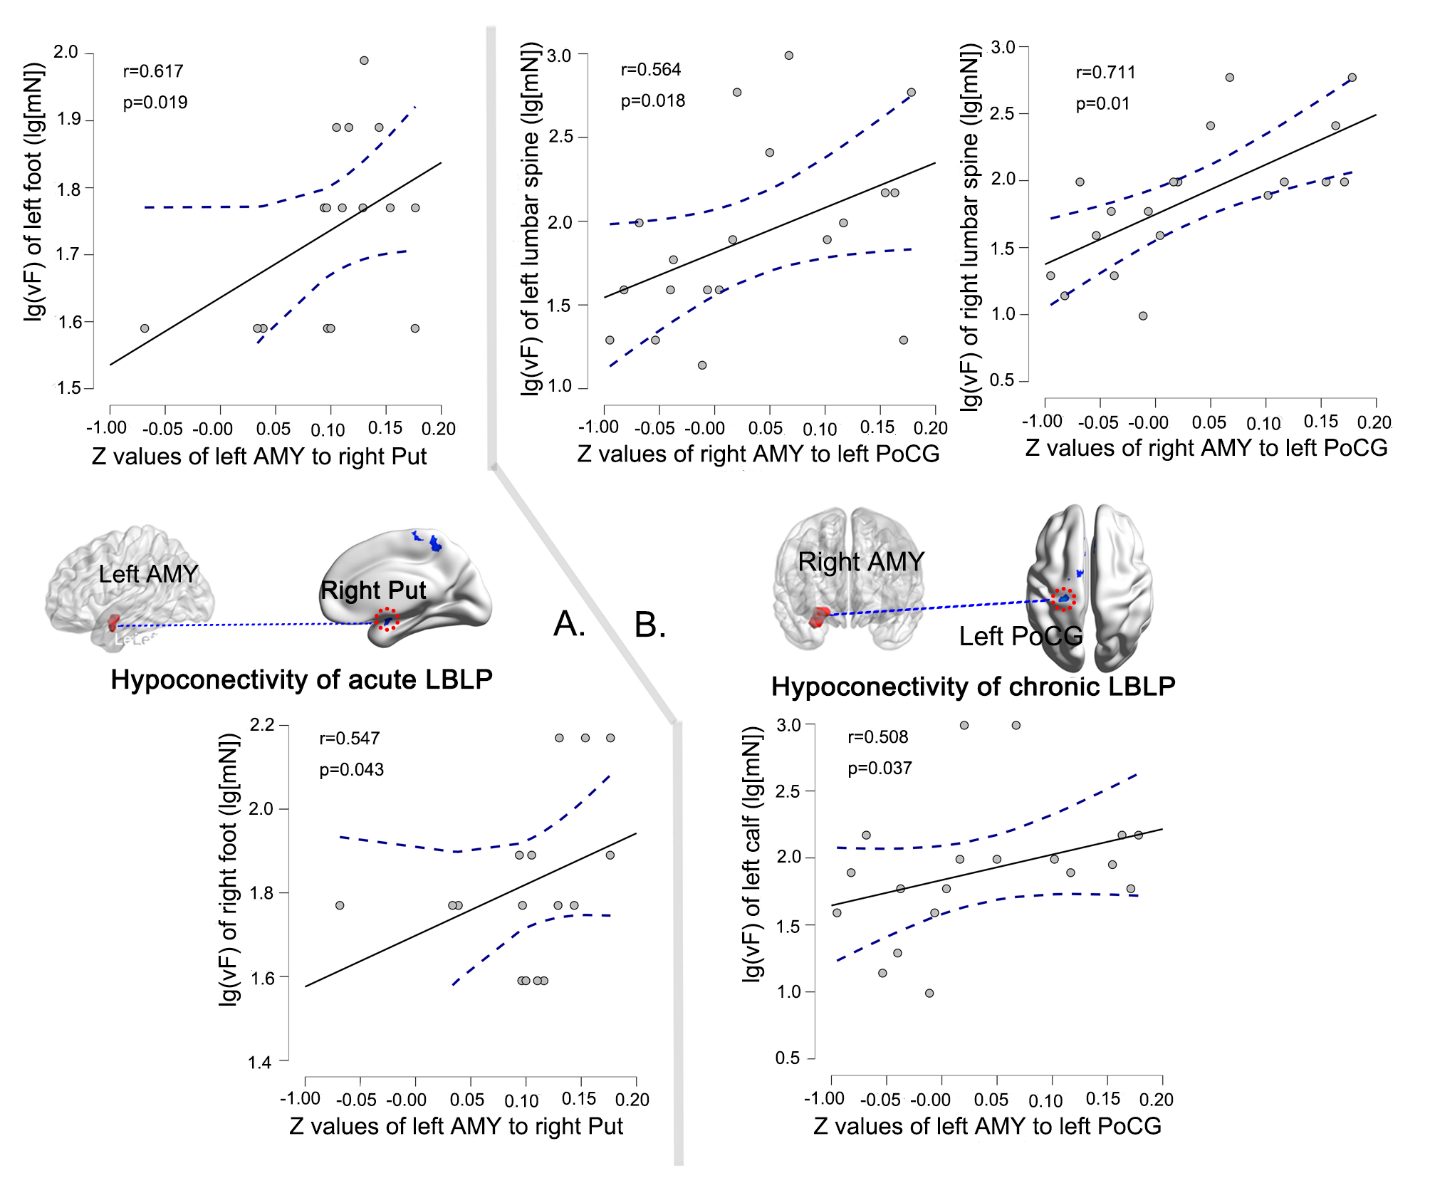


**Abbreviations:** LBLP, low-back-related leg pain; AMY, amygdala; Put, putamen; PoCG, postcentral gyrus; vF, von Frey filament.
